# Supplementary material
Source: PubMed Central journal article supplement (PMC3694764)
Supplement: NIHMS466298-supplement-2.pdf [file NIHMS466298-supplement-2.pdf]

## **Supplementary Tables (1 PDF file)**

### **Identification of Targetable FGFR Gene Fusions in Diverse Cancers**

Yi-Mi Wu, Fengyun Su, Shanker Kalyana-Sundaram, Nick Khazanov, Bushra Ateeq, Xuhong Cao, Robert J. Lonigro, Pankaj Vats, Rui Wang, Su-Fang Lin, Ann-Joy Cheng, Lakshmi P. Kunju, Javed Siddiqui, Scott A. Tomlins, Peter Wyngaard, Seth Sadis, Sameek Roychowdhury, Maha H. Hussain, Felix Feng, Mark M. Zalupski, Moshe Talpaz, Kenneth J. Pienta, Daniel R. Rhodes, Dan R. Robinson, and Arul M. Chinnaiyan

Supplementary Tables S1-S15 include transcriptome and exome sequencing results for the FGFR fusion positive index cases, and summaries of sequencing cohorts.

**Supplementary Table S1. Nonsynonymous somatic mutations in MO\_1036 cholangiocarcinoma.**

| SAMPLE         | GENE           | LOC (hg18)           | REFERENCE | VARIANT  | VAR FRAGS TUMOR | TUMOR TOTAL FRAGS | VAR FRAC TUMOR | PROTEIN       | BLOSUM SCORE | EXPRESSION LEVEL (RPKM) |
|----------------|----------------|----------------------|-----------|----------|-----------------|-------------------|----------------|---------------|--------------|-------------------------|
| MO_1036        | <b>ARID1A</b>  | <b>chr1:26974022</b> | <b>C</b>  | <b>T</b> | <b>38</b>       | <b>110</b>        | <b>0.35</b>    | <b>Q1573*</b> | <b>-4</b>    | <b>9.2</b>              |
| MO_1036        | <i>LRRC24</i>  | chr8:145719484       | A         | G        | 112             | 276               | 0.41           | L242P         | -3           | 9.0                     |
| <b>MO_1036</b> | <b>PBRM1</b>   | <b>chr3:52618728</b> | <b>A</b>  | <b>T</b> | <b>47</b>       | <b>115</b>        | <b>0.41</b>    | <b>C736*</b>  | <b>-4</b>    | <b>2.4</b>              |
| MO_1036        | <i>GFRA1</i>   | chr10:117846228      | C         | T        | 17              | 69                | 0.25           | E265K         | 1            | 0.7                     |
| MO_1036        | <i>MADCAM1</i> | chr19:452701         | G         | A        | 7               | 28                | 0.25           | D234N         | 1            | 0.3                     |
| MO_1036        | <i>ROR2</i>    | chr9:93526123        | T         | A        | 25              | 163               | 0.15           | Q825L         | -2           | 0.2                     |
| MO_1036        | <i>OR51D1</i>  | chr11:4618548        | A         | G        | 95              | 236               | 0.40           | M318V         | 1            | 0.0                     |
| MO_1036        | <i>RPL3L</i>   | chr16:1944012        | C         | T        | 29              | 107               | 0.27           | G48S          | 0            | 0.0                     |

**Supplementary Table S2. Gene copy number changes in MO\_1036 cholangiocarcinoma.**

| <b>Sample</b> | <b>Segment (hg18)</b>   | <b>Genes in this region</b>                 | <b>Span (bp)</b> | <b>Number of exons</b> | <b>Copy number ratio (gains)</b> |
|---------------|-------------------------|---------------------------------------------|------------------|------------------------|----------------------------------|
| MO_1036       | chr18:12874154-12938146 | <i>PTPN2, SEH11</i>                         | 63,992           | 2                      | 3.74                             |
| MO_1036       | chr11:63709893-63710241 | <i>STIP1</i>                                | 348              | 2                      | 3.10                             |
| MO_1036       | chr19:4408610-4423383   | <i>UBXN6, HDGF2</i>                         | 14,773           | 2                      | 3.08                             |
| MO_1036       | chr5:10303134-10303443  | <i>CCT5</i>                                 | 309              | 2                      | 2.40                             |
| MO_1036       | chr6:26128947-26325246  | <i>HFE, HIST1H3A, HIST1H4A, HIST1H4B</i>    | 196,299          | 35                     | 1.57                             |
| MO_1036       | chr12:9639140-10265625  | <i>LOC374443, CLEC2D/2B/L1, CD69, KLRF1</i> | 626,485          | 95                     | 1.56                             |
| MO_1036       | chr18:16944866-20311136 | <i>RIOK3, ROCK1</i>                         | 3,366,270        | 331                    | 1.53                             |
| MO_1036       | chr13:27417497-30093937 | <i>CDX2, FLT1, FLT3</i>                     | 2,676,440        | 142                    | 1.51                             |
| MO_1036       | chr13:32911844-33438270 | <i>STARD13, RFC3</i>                        | 526,426          | 12                     | 1.48                             |
| MO_1036       | chr12:78680-9468534     | <i>CCND2, DYRK4, KDM5A, WNK1, ZNF384</i>    | 9,389,854        | 1212                   | 1.47                             |

**Supplementary Table S3. Gene fusions identified in MO\_1036. FGFR2 fusion is in bold.**

| Sample  | 5' Gene                | 3' Gene               | Number of Supporting Reads | Type                    |
|---------|------------------------|-----------------------|----------------------------|-------------------------|
| MO_1036 | <i>CDC42SE2</i>        | <i>DNMT2 (TRDMT1)</i> | 515                        | Interchromosomal        |
| MO_1036 | <b><i>FGFR2</i></b>    | <b><i>BICC1</i></b>   | <b>259</b>                 | <b>Intrachromosomal</b> |
| MO_1036 | <i>ALS2CR16</i>        | <i>ALS2CR8</i>        | 111                        | Intrachromosomal        |
| MO_1036 | <i>uc003sbm (MSH5)</i> | <i>NFKBIL1</i>        | 17                         | Intrachromosomal        |
| MO_1036 | <i>LPCAT3</i>          | <i>C1RL</i>           | 15                         | Intrachromosomal        |
| MO_1036 | <i>FAM114A2</i>        | <i>CDC42SE2</i>       | 11                         | Intrachromosomal        |
| MO_1036 | <i>CDC42SE2</i>        | <i>TRDMT1</i>         | 9                          | Interchromosomal        |
| MO_1036 | <i>THRAP3</i>          | <i>STK40</i>          | 4                          | Intrachromosomal        |

Supplementary Table S4. Gene fusions identified in MO\_1039. FGFR2 fusion is in bold.

| Sample  | 5' Gene       | 3' Gene          | Number of Supporting Reads | Type                    |
|---------|---------------|------------------|----------------------------|-------------------------|
| MO_1039 | <b>FGFR2</b>  | <b>BICC1</b>     | <b>83</b>                  | <b>Intrachromosomal</b> |
| MO_1039 | <i>LDB1</i>   | <i>BICC1</i>     | 30                         | Intrachromosomal        |
| MO_1039 | <i>FAM62A</i> | <i>LOC728937</i> | 20                         | Intrachromosomal        |
| MO_1039 | <i>GLG1</i>   | <i>GRM5</i>      | 14                         | Interchromosomal        |
| MO_1039 | <i>AIFM1</i>  | <i>FGF13</i>     | 3                          | Intrachromosomal        |

Supplementary Table S5. Nonsynonymous somatic mutations in MO\_1039 cholangiocarcinoma.

| SAMPLE  | GENE               | LOC (hg18)           | REFERENCE | VARIANT  | VAR FRAGS TUMOR | TUMOR TOTAL FRAGS | VAR FRAC TUMOR | PROTEIN      | BLOSUM SCORE | EXPRESSION LEVEL (RPKM) |
|---------|--------------------|----------------------|-----------|----------|-----------------|-------------------|----------------|--------------|--------------|-------------------------|
| MO_1039 | <i>EEF1D</i>       | chr8:144743100       | C         | T        | 33              | 175               | 0.19           | A99T         | 0            | 105.1                   |
| MO_1039 | <i>GNAS</i>        | chr20:56862022       | C         | T        | 66              | 173               | 0.38           | P103S        | -1           | 69.1                    |
| MO_1039 | <i>GNAS</i>        | chr20:56862021       | G         | A        | 68              | 175               | 0.39           | M102I        | 1            | 69.1                    |
| MO_1039 | <i>RNF130</i>      | chr5:179372696       | T         | A        | 38              | 105               | 0.36           | R222W        | -3           | 40.6                    |
| MO_1039 | <i>PRPF3</i>       | chr1:148572293       | C         | A        | 61              | 215               | 0.28           | P243T        | -1           | 39.4                    |
| MO_1039 | <i>NFE2L2</i>      | chr2:177807205       | T         | C        | 38              | 88                | 0.43           | D29G         | -1           | 30.0                    |
| MO_1039 | <i>IRF2BP1</i>     | chr19:51080358       | G         | A        | 83              | 205               | 0.40           | S172F        | -2           | 20.1                    |
| MO_1039 | <i>GPT</i>         | chr8:145702753       | A         | G        | 33              | 106               | 0.31           | N398S        | 1            | 19.9                    |
| MO_1039 | <b><i>TP53</i></b> | <b>chr17:7517864</b> | <b>G</b>  | <b>A</b> | <b>50</b>       | <b>83</b>         | <b>0.60</b>    | <b>R267W</b> | <b>-3</b>    | <b>19.2</b>             |
| MO_1039 | <i>PRODH2</i>      | chr19:40982805       | G         | A        | 17              | 66                | 0.26           | P529L        | -3           | 9.6                     |
| MO_1039 | <i>NASP</i>        | chr1:45852427        | A         | C        | 15              | 61                | 0.25           | I529L        | 2            | 8.9                     |
| MO_1039 | <i>IPO7</i>        | chr11:9416221        | G         | A        | 19              | 41                | 0.46           | M836I        | 1            | 8.6                     |
| MO_1039 | <i>ZBTB33</i>      | chrX:119271861       | C         | A        | 6               | 30                | 0.20           | S188Y        | -2           | 7.6                     |
| MO_1039 | <i>BCOR</i>        | chrX:39807134        | G         | C        | 50              | 71                | 0.70           | Q1294E       | 2            | 6.1                     |
| MO_1039 | <i>YARS2</i>       | chr12:32799976       | C         | A        | 58              | 146               | 0.40           | G34C         | -3           | 5.7                     |
| MO_1039 | <i>PDE4DIP</i>     | chr1:143626918       | G         | A        | 10              | 35                | 0.29           | R622*        | -4           | 5.0                     |
| MO_1039 | <i>EPHB3</i>       | chr3:185773007       | G         | A        | 37              | 99                | 0.37           | D69N         | 1            | 4.8                     |
| MO_1039 | <i>KIAA1199</i>    | chr15:78968899       | A         | C        | 31              | 68                | 0.46           | K333Q        | 1            | 2.2                     |
| MO_1039 | <i>RIC8B</i>       | chr12:105778179      | A         | T        | 6               | 25                | 0.24           | D437V        | -3           | 2.2                     |
| MO_1039 | <i>SPAG1</i>       | chr8:101275567       | G         | A        | 33              | 53                | 0.62           | E331K        | 1            | 1.8                     |
| MO_1039 | <i>SHROOM4</i>     | chrX:50394164        | G         | T        | 97              | 146               | 0.66           | T550K        | -1           | 0.5                     |
| MO_1039 | <i>CDKL5</i>       | chrX:18532688        | G         | A        | 118             | 184               | 0.64           | E575K        | 1            | 0.1                     |
| MO_1039 | <i>EMR3</i>        | chr19:14609990       | C         | T        | 56              | 141               | 0.40           | G471S        | 0            | 0.1                     |
| MO_1039 | <i>KCNA10</i>      | chr1:110861676       | C         | T        | 50              | 171               | 0.29           | M419I        | 1            | 0.1                     |
| MO_1039 | <i>FAM19A4</i>     | chr3:68884793        | C         | T        | 25              | 104               | 0.24           | R66H         | 0            | 0.0                     |
| MO_1039 | <i>PRDM9</i>       | chr5:23558241        | G         | C        | 7               | 69                | 0.10           | V194L        | 1            | 0.0                     |
| MO_1039 | <i>CSRNP1</i>      | chr3:39161733        | C         | T        | 11              | 54                | 0.20           | R75Q         | 1            | NA                      |

**Supplementary Table S6. Gene copy number changes in MO\_1039 cholangiocarcinoma.**

| <b>Sample</b> | <b>Segment (hg18)</b>    | <b>Genes in this region</b>                    | <b>Span (bp)</b> | <b>Number of exons</b> | <b>Copy number ratio (gains)</b>  |
|---------------|--------------------------|------------------------------------------------|------------------|------------------------|-----------------------------------|
| MO_1039       | chr1:153098887-153716609 | <i>CLK2,MUC1</i>                               | 617,722          | 220                    | 3.61                              |
| MO_1039       | chr1:144963163-145553014 | <i>BCL9</i>                                    | 589851           | 47                     | 2.89                              |
| MO_1039       | chr1:153757794-161591884 | <i>DDR2,FCGR2B,INSRR,NTRK1,PRCC,SDHC,UHMK1</i> | 7,834,090        | 1244                   | 2.89                              |
| MO_1039       | chr1:148124359-150554432 | <i>ARNT</i>                                    | 2430073          | 561                    | 2.86                              |
| MO_1039       | chr1:150649330-152976224 | <i>NPR1,TPM3</i>                               | 2,326,894        | 388                    | 2.83                              |
| MO_1039       | chr1:145554338-145882120 | <i>BCL9</i>                                    | 327,782          | 17                     | 2.20                              |
| MO_1039       | chr20:30074126-30126201  | <i>HCK</i>                                     | 52,075           | 12                     | 2.15                              |
| MO_1039       | chr1:150589796-150597931 | <i>FLG2</i>                                    | 8,135            | 12                     | 2.12                              |
| MO_1039       | chr1:152994932-153061274 | <i>KCNN3</i>                                   | 66,342           | 5                      | 2.12                              |
| MO_1039       | chr16:69441206-69754032  | <i>HYDIN</i>                                   | 312,826          | 72                     | 1.97                              |
| MO_1039       | chr1:162512589-162795748 | <i>PBX1</i>                                    | 283,159          | 2                      | 1.96                              |
| <b>Sample</b> | <b>Segment (hg18)</b>    | <b>Genes in this region</b>                    | <b>Span (bp)</b> | <b>Number of exons</b> | <b>Copy number ratio (losses)</b> |
| MO_1039       | chr6:168856780-168857712 | --                                             | 932              | 3                      | 0.37                              |
| MO_1039       | chr8:935432-947796       | <i>ERICH1-AS1</i>                              | 12,364           | 2                      | 0.38                              |
| MO_1039       | chr21:9809235-9815818    | --                                             | 6,583            | 3                      | 0.50                              |
| MO_1039       | chr10:38835211-39184276  | <i>ACTR3BP5</i>                                | 349,065          | 3                      | 0.52                              |
| MO_1039       | chr6:74228416-74285712   | <i>MTO1,EEF1A1</i>                             | 57,296           | 18                     | 0.57                              |

Supplementary Table S7. Gene fusions identified in MO\_1051. FGFR2 fusion is in bold.

| Sample  | 5' Gene      | 3' Gene     | Number of Supporting Reads | Type                    |
|---------|--------------|-------------|----------------------------|-------------------------|
| MO_1051 | <b>FGFR2</b> | <b>AFF3</b> | <b>138</b>                 | <b>Interchromosomal</b> |
| MO_1051 | TBCK         | PPA2        | 81                         | Intrachromosomal        |
| MO_1051 | CMAS         | PIK3C2G     | 73                         | Intrachromosomal        |
| MO_1051 | GPATCH8      | MPP2        | 24                         | Intrachromosomal        |
| MO_1051 | IKBKG        | PLXNB3      | 3                          | Intrachromosomal        |
| MO_1051 | ITFG1        | NETO2       | 53                         | Read through            |
| MO_1051 | TXNDC11      | AK126539    | 2                          | Read through            |



**Supplementary Table S8. Nonsynonymous somatic mutations in MO\_1051 breast cancer (Part-1).**

| SAMPLE  | GENE            | LOC (hg18)      | REFERENCE | VARIANT | VAR FRAGS TUMOR | TUMOR TOTAL FRAGS | VAR FRAC TUMOR | PROTEIN | BLOSUM SCORE | EXPRESSION LEVEL (RPKM) |
|---------|-----------------|-----------------|-----------|---------|-----------------|-------------------|----------------|---------|--------------|-------------------------|
| MO_1051 | <i>B4GALT3</i>  | chr1:159410453  | C         | T       | 32              | 145               | 0.22           | G167E   | -2           | 125.1                   |
| MO_1051 | <i>GANAB</i>    | chr11:62154735  | C         | T       | 38              | 144               | 0.26           | D434N   | 1            | 106.4                   |
| MO_1051 | <i>EFHD1</i>    | chr2:233206867  | C         | T       | 13              | 27                | 0.48           | A70V    | 0            | 106.2                   |
| MO_1051 | <i>NTN4</i>     | chr12:94655867  | C         | T       | 24              | 96                | 0.25           | V258I   | 3            | 94.6                    |
| MO_1051 | <i>SF1</i>      | chr11:64291716  | G         | C       | 16              | 61                | 0.26           | H415Q   | 0            | 84.1                    |
| MO_1051 | <i>QARS</i>     | chr3:49113864   | G         | C       | 19              | 82                | 0.23           | F268L   | 0            | 68.8                    |
| MO_1051 | <i>ZNF296</i>   | chr19:50267617  | C         | T       | 17              | 87                | 0.20           | W170*   | -4           | 59.6                    |
| MO_1051 | <i>ZNF296</i>   | chr19:50267290  | C         | G       | 26              | 100               | 0.26           | K279N   | 0            | 59.6                    |
| MO_1051 | <i>PLXNB1</i>   | chr3:48431630   | C         | T       | 28              | 98                | 0.29           | E1309K  | 1            | 55.9                    |
| MO_1051 | <i>HDAC7</i>    | chr12:46475778  | G         | A       | 18              | 51                | 0.35           | R277W   | -3           | 50.0                    |
| MO_1051 | <i>TMEM214</i>  | chr2:27116434   | C         | T       | 15              | 69                | 0.22           | S552F   | -2           | 48.9                    |
| MO_1051 | <i>DAG1</i>     | chr3:49545538   | C         | A       | 17              | 57                | 0.30           | Q864K   | 1            | 44.0                    |
| MO_1051 | <i>DAG1</i>     | chr3:49545403   | C         | G       | 17              | 76                | 0.22           | L819V   | 1            | 44.0                    |
| MO_1051 | <i>DAG1</i>     | chr3:49545024   | C         | G       | 30              | 124               | 0.24           | F692L   | 0            | 44.0                    |
| MO_1051 | <i>DAG1</i>     | chr3:49545321   | C         | A       | 34              | 100               | 0.34           | F791L   | 0            | 44.0                    |
| MO_1051 | <i>PLEKHA6</i>  | chr1:202486311  | C         | T       | 11              | 66                | 0.17           | E527K   | 1            | 40.9                    |
| MO_1051 | <i>ZFP36L2</i>  | chr2:43306032   | G         | A       | 34              | 127               | 0.27           | Q139*   | -4           | 37.5                    |
| MO_1051 | <i>COMTD1</i>   | chr10:76665477  | C         | T       | 37              | 109               | 0.34           | R42Q    | 1            | 35.1                    |
| MO_1051 | <i>NACC1</i>    | chr19:13107913  | C         | T       | 24              | 80                | 0.30           | R298W   | -3           | 34.9                    |
| MO_1051 | <i>TOP1</i>     | chr20:39160281  | G         | A       | 15              | 73                | 0.21           | E289K   | 1            | 34.8                    |
| MO_1051 | <i>TOP1</i>     | chr20:39160379  | G         | C       | 14              | 93                | 0.15           | K321N   | 0            | 34.8                    |
| MO_1051 | <i>MGRN1</i>    | chr16:4615042   | C         | A       | 20              | 71                | 0.28           | P27Q    | -1           | 34.1                    |
| MO_1051 | <i>TUBA1B</i>   | chr12:47809566  | C         | G       | 15              | 69                | 0.22           | L70F    | 0            | 34.1                    |
| MO_1051 | <i>THBS2</i>    | chr6:169390445  | G         | A       | 32              | 97                | 0.33           | H201Y   | 2            | 33.4                    |
| MO_1051 | <i>RAVER1</i>   | chr19:10290021  | C         | T       | 7               | 37                | 0.19           | E642K   | 1            | 31.7                    |
| MO_1051 | <i>LUC7L2</i>   | chr7:138733981  | G         | C       | 11              | 48                | 0.23           | D85H    | -1           | 30.5                    |
| MO_1051 | <i>PSMD1</i>    | chr2:231645346  | G         | A       | 12              | 62                | 0.19           | G285D   | -1           | 29.8                    |
| MO_1051 | <i>DHX30</i>    | chr3:47862272   | G         | A       | 25              | 101               | 0.25           | E340K   | 1            | 26.4                    |
| MO_1051 | <i>DYNC1H1</i>  | chr14:101536124 | G         | A       | 10              | 34                | 0.29           | E1284K  | 1            | 25.9                    |
| MO_1051 | <i>ZFAND6</i>   | chr15:78201199  | C         | T       | 21              | 71                | 0.30           | S82F    | -2           | 25.9                    |
| MO_1051 | <i>ZNF213</i>   | chr16:3131032   | C         | T       | 28              | 114               | 0.25           | R355C   | -3           | 25.5                    |
| MO_1051 | <i>TRIM26</i>   | chr6:30262081   | C         | G       | 43              | 158               | 0.27           | E391Q   | 2            | 25.4                    |
| MO_1051 | <i>SLC35B1</i>  | chr17:45135284  | G         | T       | 19              | 61                | 0.31           | S284Y   | -2           | 24.4                    |
| MO_1051 | <i>PIN1</i>     | chr19:9810216   | G         | A       | 6               | 29                | 0.21           | V55I    | 3            | 23.8                    |
| MO_1051 | <i>SLC38A10</i> | chr17:76840980  | C         | G       | 26              | 115               | 0.23           | E519Q   | 2            | 23.8                    |
| MO_1051 | <i>ANKRD30A</i> | chr10:37548514  | G         | A       | 11              | 53                | 0.21           | E1234K  | 1            | 23.3                    |

Supplementary Table S8. Nonsynonymous somatic mutations in MO\_1051 breast cancer (Part-2).

| SAMPLE  | GENE               | LOC (hg18)           | REFERENCE | VARIANT  | VAR FRAGS TUMOR | TUMOR TOTAL FRAGS | VAR FRAC TUMOR | PROTEIN      | BLOSUM SCORE | EXPRESSION LEVEL (RPKM) |
|---------|--------------------|----------------------|-----------|----------|-----------------|-------------------|----------------|--------------|--------------|-------------------------|
| MO_1051 | <i>USP22</i>       | chr17:20856759       | G         | A        | 15              | 56                | 0.27           | S307L        | -2           | 23.2                    |
| MO_1051 | <i>SLC15A3</i>     | chr11:60466117       | G         | C        | 21              | 87                | 0.24           | S358C        | -1           | 22.3                    |
| MO_1051 | <i>LRPPRC</i>      | chr2:44024438        | C         | G        | 45              | 154               | 0.29           | R799T        | -1           | 20.5                    |
| MO_1051 | <i>SKI</i>         | chr1:2225661         | C         | G        | 29              | 102               | 0.28           | S515C        | -1           | 20.4                    |
| MO_1051 | <i>CC2D1A</i>      | chr19:13899076       | G         | C        | 32              | 86                | 0.37           | E772Q        | 2            | 20.1                    |
| MO_1051 | <i>RAP1GAP</i>     | chr1:21801938        | G         | C        | 27              | 104               | 0.26           | S495C        | -1           | 18.9                    |
| MO_1051 | <i>HTATSF1</i>     | chrX:135421575       | G         | C        | 17              | 94                | 0.18           | D669H        | -1           | 18.7                    |
| MO_1051 | <i>TRIM41</i>      | chr5:180593353       | C         | G        | 33              | 126               | 0.26           | F425L        | 0            | 18.7                    |
| MO_1051 | <i>GATAD2B</i>     | chr1:152067127       | C         | G        | 36              | 152               | 0.24           | M107I        | 1            | 18.7                    |
| MO_1051 | <i>LSS</i>         | chr21:46435568       | C         | A        | 27              | 79                | 0.34           | A693S        | 1            | 18.5                    |
| MO_1051 | <i>LFNG</i>        | chr7:2533058         | C         | G        | 11              | 50                | 0.22           | F350L        | 0            | 18.2                    |
| MO_1051 | <i>ABCG1</i>       | chr21:42570107       | G         | A        | 26              | 115               | 0.23           | E191K        | 1            | 16.9                    |
| MO_1051 | <b><i>TP53</i></b> | <b>chr17:7518978</b> | <b>C</b>  | <b>T</b> | <b>28</b>       | <b>81</b>         | <b>0.35</b>    | <b>G199E</b> | <b>-2</b>    | <b>14.9</b>             |
| MO_1051 | <i>SHROOM3</i>     | chr4:77879341        | C         | T        | 39              | 132               | 0.30           | Q330*        | -4           | 14.9                    |
| MO_1051 | <i>HOXB7</i>       | chr17:44040370       | T         | C        | 19              | 116               | 0.16           | T163A        | 0            | 13.8                    |
| MO_1051 | <i>IMPAD1</i>      | chr8:58041381        | G         | A        | 21              | 93                | 0.23           | S244F        | -2           | 13.8                    |
| MO_1051 | <i>MAN2A1</i>      | chr5:109218851       | G         | A        | 32              | 108               | 0.30           | E1030K       | 1            | 13.3                    |
| MO_1051 | <i>SEC63</i>       | chr6:108321444       | T         | C        | 7               | 49                | 0.14           | T537A        | 0            | 13.0                    |
| MO_1051 | <i>KIAA0562</i>    | chr1:3751724         | C         | T        | 16              | 57                | 0.28           | E160K        | 1            | 13.0                    |
| MO_1051 | <i>DYRK1A</i>      | chr21:37784455       | C         | G        | 27              | 119               | 0.23           | S258C        | -1           | 12.7                    |
| MO_1051 | <i>FAM8A1</i>      | chr6:17708899        | G         | C        | 28              | 79                | 0.35           | E94Q         | 2            | 12.6                    |
| MO_1051 | <i>KLHL17</i>      | chr1:886979          | G         | A        | 24              | 95                | 0.25           | E159K        | 1            | 12.4                    |
| MO_1051 | <i>BAZ1A</i>       | chr14:34322801       | C         | G        | 9               | 46                | 0.20           | D639H        | -1           | 12.0                    |
| MO_1051 | <i>ZNF747</i>      | chr16:30453456       | G         | C        | 25              | 97                | 0.26           | L16V         | 1            | 11.6                    |
| MO_1051 | <i>ZNF646</i>      | chr16:30996797       | G         | A        | 42              | 148               | 0.28           | D551N        | 1            | 11.4                    |
| MO_1051 | <i>GMNN</i>        | chr6:24893986        | G         | A        | 35              | 117               | 0.30           | D204N        | 1            | 11.4                    |
| MO_1051 | <i>NUP205</i>      | chr7:134965696       | G         | T        | 14              | 43                | 0.33           | S1666I       | -2           | 11.3                    |
| MO_1051 | <i>MANBA</i>       | chr4:103776138       | C         | G        | 16              | 86                | 0.19           | E697Q        | 2            | 10.9                    |
| MO_1051 | <i>DHX29</i>       | chr5:54594505        | C         | G        | 11              | 58                | 0.19           | E1180Q       | 2            | 10.8                    |
| MO_1051 | <i>TRAPPC4</i>     | chr11:118396114      | C         | T        | 41              | 120               | 0.34           | S132L        | -2           | 10.7                    |
| MO_1051 | <i>PTPRT</i>       | chr20:40818629       | G         | A        | 19              | 78                | 0.24           | S249L        | -2           | 10.5                    |
| MO_1051 | <i>PLEKHG5</i>     | chr1:6453505         | C         | G        | 15              | 42                | 0.36           | Q473H        | 0            | 10.3                    |
| MO_1051 | <i>USP36</i>       | chr17:74315271       | C         | T        | 28              | 120               | 0.23           | E484K        | 1            | 9.5                     |
| MO_1051 | <i>C5orf51</i>     | chr5:41940308        | G         | A        | 20              | 85                | 0.24           | E28K         | 1            | 9.5                     |
| MO_1051 | <i>NUFIP2</i>      | chr17:24637332       | C         | G        | 33              | 122               | 0.27           | Q602H        | 0            | 9.0                     |
| MO_1051 | <i>NUFIP2</i>      | chr17:24638225       | C         | A        | 33              | 112               | 0.29           | D305Y        | -3           | 9.0                     |

**Supplementary Table S8. Nonsynonymous somatic mutations in MO\_1051 breast cancer (Part-3).**

| SAMPLE  | GENE            | LOC (hg18)      | REFERENCE | VARIANT | VAR FRAGS TUMOR | TUMOR TOTAL FRAGS | VAR FRAC TUMOR | PROTEIN         | BLOSUM SCORE | EXPRESSION LEVEL (RPKM) |
|---------|-----------------|-----------------|-----------|---------|-----------------|-------------------|----------------|-----------------|--------------|-------------------------|
| MO_1051 | <i>NUFIP2</i>   | chr17:24638363  | C         | G       | 33              | 119               | 0.28           | E259Q           | 2            | 9.0                     |
| MO_1051 | <i>NUFIP2</i>   | chr17:24637377  | C         | G       | 27              | 114               | 0.24           | E587D           | 2            | 9.0                     |
| MO_1051 | <i>NUFIP2</i>   | chr17:24637206  | C         | G       | 35              | 119               | 0.29           | Q644H           | 0            | 9.0                     |
| MO_1051 | <i>NUFIP2</i>   | chr17:24638147  | C         | G       | 35              | 113               | 0.31           | E331Q           | 2            | 9.0                     |
| MO_1051 | <i>AFF4</i>     | chr5:132260052  | C         | G       | 32              | 131               | 0.24           | L723F           | 0            | 8.9                     |
| MO_1051 | <i>SIN3A</i>    | chr15:73451408  | G         | A       | 42              | 127               | 0.33           | R1263C          | -3           | 8.9                     |
| MO_1051 | <i>C3orf63</i>  | chr3:56650564   | G         | C       | 27              | 93                | 0.29           | D428E           | 2            | 8.4                     |
| MO_1051 | <i>GBP2</i>     | chr1:89355953   | G         | C       | 16              | 67                | 0.24           | P174A           | -1           | 8.4                     |
| MO_1051 | <i>USP48</i>    | chr1:21902699   | C         | G       | 10              | 37                | 0.27           | Splice acceptor |              | 8.2                     |
| MO_1051 | <i>USP48</i>    | chr1:21900628   | C         | T       | 8               | 38                | 0.21           | D893N           | 1            | 8.2                     |
| MO_1051 | <i>USP48</i>    | chr1:21902642   | C         | T       | 29              | 83                | 0.35           | E858K           | 1            | 8.2                     |
| MO_1051 | <i>MCM2</i>     | chr3:128807680  | G         | A       | 34              | 110               | 0.31           | E235K           | 1            | 8.0                     |
| MO_1051 | <i>PTK2B</i>    | chr8:27350634   | G         | A       | 24              | 76                | 0.32           | E474K           | 1            | 7.8                     |
| MO_1051 | <i>GPATCH8</i>  | chr17:39832348  | C         | T       | 56              | 142               | 0.39           | D875N           | 1            | 7.6                     |
| MO_1051 | <i>NT5DC1</i>   | chr6:116528847  | C         | G       | 13              | 40                | 0.33           | L21V            | 1            | 7.6                     |
| MO_1051 | <i>PANX1</i>    | chr11:93502171  | C         | G       | 24              | 77                | 0.31           | F15L            | 0            | 7.4                     |
| MO_1051 | <i>NOL8</i>     | chr9:94116453   | C         | T       | 35              | 111               | 0.32           | E759K           | 1            | 6.7                     |
| MO_1051 | <i>SRR</i>      | chr17:2171641   | G         | T       | 10              | 40                | 0.25           | G192V           | -3           | 6.6                     |
| MO_1051 | <i>IGF1R</i>    | chr15:97273886  | G         | C       | 11              | 70                | 0.16           | K560N           | 0            | 6.2                     |
| MO_1051 | <i>C12orf35</i> | chr12:32029593  | G         | A       | 24              | 100               | 0.24           | M1479I          | 1            | 5.8                     |
| MO_1051 | <i>TRMT12</i>   | chr8:125533520  | G         | A       | 36              | 127               | 0.28           | E391K           | 1            | 5.6                     |
| MO_1051 | <i>ZNF770</i>   | chr15:33062510  | C         | T       | 51              | 139               | 0.37           | A140T           | 0            | 5.6                     |
| MO_1051 | <i>HSPA13</i>   | chr21:14668314  | G         | C       | 34              | 129               | 0.26           | S304C           | -1           | 5.5                     |
| MO_1051 | <i>GTF2E1</i>   | chr3:121982852  | G         | A       | 49              | 150               | 0.33           | E389K           | 1            | 4.8                     |
| MO_1051 | <i>ITSN1</i>    | chr21:34091656  | G         | A       | 10              | 50                | 0.20           | E686K           | 1            | 4.7                     |
| MO_1051 | <i>PGLYRP2</i>  | chr19:15443755  | C         | T       | 28              | 99                | 0.28           | R430H           | 0            | 4.7                     |
| MO_1051 | <i>ZKSCAN1</i>  | chr7:99469022   | G         | C       | 10              | 35                | 0.29           | E320Q           | 2            | 4.4                     |
| MO_1051 | <i>C2orf69</i>  | chr2:200484591  | G         | A       | 32              | 100               | 0.32           | G62E            | -2           | 4.4                     |
| MO_1051 | <i>MASP1</i>    | chr3:188463101  | G         | C       | 20              | 59                | 0.34           | F113L           | 0            | 4.4                     |
| MO_1051 | <i>RANBP6</i>   | chr9:6003154    | C         | G       | 31              | 118               | 0.26           | L818F           | 0            | 4.3                     |
| MO_1051 | <i>CD52</i>     | chr1:26519322   | G         | A       | 43              | 131               | 0.33           | G43E            | -2           | 4.2                     |
| MO_1051 | <i>CD97</i>     | chr19:14378256  | C         | G       | 32              | 119               | 0.27           | F645L           | 0            | 4.2                     |
| MO_1051 | <i>NFATC1</i>   | chr18:75388521  | G         | A       | 11              | 79                | 0.14           | E917K           | 1            | 4.1                     |
| MO_1051 | <i>PPP1R12B</i> | chr1:200678203  | C         | T       | 13              | 85                | 0.15           | S516L           | -2           | 3.8                     |
| MO_1051 | <i>PPTC7</i>    | chr12:109474148 | C         | T       | 17              | 101               | 0.17           | D78N            | 1            | 3.8                     |
| MO_1051 | <i>MYST3</i>    | chr8:41953913   | G         | A       | 37              | 96                | 0.39           | S378L           | -2           | 3.8                     |

Supplementary Table S8. Nonsynonymous somatic mutations in MO\_1051 breast cancer (Part-4).

| SAMPLE  | GENE                 | LOC (hg18)            | REFERENCE | VARIANT  | VAR FRAGS TUMOR | TUMOR TOTAL FRAGS | VAR FRAC TUMOR | PROTEIN         | BLOSUM SCORE | EXPRESSION LEVEL (RPKM) |
|---------|----------------------|-----------------------|-----------|----------|-----------------|-------------------|----------------|-----------------|--------------|-------------------------|
| MO_1051 | <i>FLT4</i>          | chr5:179980613        | C         | G        | 20              | 77                | 0.26           | G723A           | 0            | 3.8                     |
| MO_1051 | <i>XDH</i>           | chr2:31426198         | G         | A        | 27              | 88                | 0.31           | R943W           | -3           | 3.7                     |
| MO_1051 | <i>FYN</i>           | chr6:112089807        | C         | T        | 24              | 113               | 0.21           | R481Q           | 1            | 3.6                     |
| MO_1051 | <i>HIVEP1</i>        | chr6:12233605         | C         | T        | 40              | 148               | 0.27           | S1864F          | -2           | 3.5                     |
| MO_1051 | <i>CYP4F2</i>        | chr19:15858055        | C         | G        | 8               | 46                | 0.17           | E328Q           | 2            | 3.5                     |
| MO_1051 | <i>TTC30A</i>        | chr2:178190124        | C         | T        | 14              | 53                | 0.26           | E518K           | 1            | 3.4                     |
| MO_1051 | <i>CCDC99</i>        | chr5:168953832        | G         | A        | 33              | 124               | 0.27           | E213K           | 1            | 3.3                     |
| MO_1051 | <b><i>PIK3CA</i></b> | <b>chr3:180434779</b> | <b>A</b>  | <b>G</b> | <b>27</b>       | <b>88</b>         | <b>0.31</b>    | <b>H1047R</b>   | <b>0</b>     | <b>3.2</b>              |
| MO_1051 | <i>TBC1D7</i>        | chr6:13413319         | G         | A        | 18              | 73                | 0.25           | S292L           | -2           | 3.1                     |
| MO_1051 | <i>VPS13C</i>        | chr15:59948176        | C         | T        | 19              | 88                | 0.22           | E3613K          | 1            | 3.0                     |
| MO_1051 | <i>EPDR1</i>         | chr7:37956359         | G         | C        | 21              | 69                | 0.30           | D291H           | -1           | 2.9                     |
| MO_1051 | <i>TACC1</i>         | chr8:38764331         | G         | A        | 21              | 54                | 0.39           | G25E            | -2           | 2.7                     |
| MO_1051 | <i>FGD6</i>          | chr12:93999456        | C         | G        | 17              | 78                | 0.22           | E1422Q          | 2            | 2.7                     |
| MO_1051 | <i>C14orf126</i>     | chr14:30987094        | C         | T        | 22              | 88                | 0.25           | E167K           | 1            | 2.6                     |
| MO_1051 | <i>CD22</i>          | chr19:40523821        | G         | A        | 14              | 81                | 0.17           | A483T           | 0            | 2.5                     |
| MO_1051 | <i>FAM83D</i>        | chr20:36988686        | G         | A        | 29              | 113               | 0.26           | D93N            | 1            | 2.5                     |
| MO_1051 | <i>FAM83D</i>        | chr20:36988515        | G         | A        | 37              | 138               | 0.27           | E36K            | 1            | 2.5                     |
| MO_1051 | <i>INTS2</i>         | chr17:57339654        | C         | G        | 35              | 122               | 0.29           | E368Q           | 2            | 2.5                     |
| MO_1051 | <i>C3orf15</i>       | chr3:120910127        | G         | C        | 21              | 84                | 0.25           | Splice acceptor |              | 2.5                     |
| MO_1051 | <i>AVIL</i>          | chr12:56489676        | C         | G        | 47              | 131               | 0.36           | E304Q           | 2            | 2.5                     |
| MO_1051 | <i>MAP1B</i>         | chr5:71526970         | G         | C        | 7               | 39                | 0.18           | E678Q           | 2            | 2.2                     |
| MO_1051 | <i>FJX1</i>          | chr11:35597631        | G         | C        | 34              | 135               | 0.25           | D291H           | -1           | 2.2                     |
| MO_1051 | <i>AR</i>            | chrX:66681775         | G         | C        | 30              | 77                | 0.39           | G21A            | 0            | 2.1                     |
| MO_1051 | <i>ZNF546</i>        | chr19:45212726        | C         | G        | 28              | 101               | 0.28           | S570*           | -4           | 2.1                     |
| MO_1051 | <i>KIAA1549</i>      | chr7:138254176        | G         | C        | 43              | 120               | 0.36           | P196A           | -1           | 2.0                     |
| MO_1051 | <i>LYST</i>          | chr1:233987317        | G         | C        | 21              | 115               | 0.18           | L2316V          | 1            | 2.0                     |
| MO_1051 | <i>ELOVL2</i>        | chr6:11097983         | A         | T        | 27              | 113               | 0.24           | L235H           | -3           | 2.0                     |
| MO_1051 | <i>C2orf67</i>       | chr2:210648720        | G         | A        | 11              | 83                | 0.13           | S519L           | -2           | 1.9                     |
| MO_1051 | <i>SEMA5B</i>        | chr3:124114940        | C         | G        | 39              | 139               | 0.28           | E768Q           | 2            | 1.7                     |
| MO_1051 | <i>GRIN2D</i>        | chr19:53637221        | G         | T        | 15              | 74                | 0.20           | E815*           | -4           | 1.6                     |
| MO_1051 | <i>PCNXL2</i>        | chr1:231227606        | A         | G        | 15              | 127               | 0.12           | I1505T          | -1           | 1.3                     |
| MO_1051 | <i>RABGAP1L</i>      | chr1:172455004        | C         | T        | 9               | 79                | 0.11           | P29L            | -3           | 1.3                     |
| MO_1051 | <i>P2RX7</i>         | chr12:120106623       | G         | A        | 37              | 103               | 0.36           | V475I           | 3            | 1.1                     |
| MO_1051 | <i>MYBL1</i>         | chr8:67641733         | C         | T        | 18              | 64                | 0.28           | E593K           | 1            | 1.0                     |
| MO_1051 | <i>KIAA1524</i>      | chr3:109755239        | C         | T        | 20              | 87                | 0.23           | E785K           | 1            | 0.9                     |
| MO_1051 | <i>FEZ1</i>          | chr11:124835703       | C         | G        | 18              | 51                | 0.35           | E190Q           | 2            | 0.9                     |

Supplementary Table S8. Nonsynonymous somatic mutations in MO\_1051 breast cancer (Part-5).

| SAMPLE  | GENE            | LOC (hg18)     | REFERENCE | VARIANT | VAR FRAGS TUMOR | TUMOR TOTAL FRAGS | VAR FRAC TUMOR | PROTEIN         | BLOSUM SCORE | EXPRESSION LEVEL (RPKM) |
|---------|-----------------|----------------|-----------|---------|-----------------|-------------------|----------------|-----------------|--------------|-------------------------|
| MO_1051 | <i>KIF21B</i>   | chr1:199215290 | G         | A       | 18              | 94                | 0.19           | L1373F          | 0            | 0.8                     |
| MO_1051 | <i>LINGO4</i>   | chr1:150040235 | G         | A       | 35              | 145               | 0.24           | P524S           | -1           | 0.7                     |
| MO_1051 | <i>ST8SIA4</i>  | chr5:100250047 | C         | T       | 42              | 138               | 0.30           | M134I           | 1            | 0.6                     |
| MO_1051 | <i>FAM124B</i>  | chr2:224952709 | G         | C       | 11              | 82                | 0.13           | S398C           | -1           | 0.6                     |
| MO_1051 | <i>ATOH8</i>    | chr2:85835449  | C         | T       | 38              | 121               | 0.31           | S209L           | -2           | 0.6                     |
| MO_1051 | <i>PNMA3</i>    | chrX:151976633 | G         | A       | 28              | 134               | 0.21           | E189K           | 1            | 0.5                     |
| MO_1051 | <i>BRIP1</i>    | chr17:57115738 | C         | T       | 43              | 142               | 0.30           | E1151K          | 1            | 0.5                     |
| MO_1051 | <i>MAML2</i>    | chr11:95465186 | G         | A       | 39              | 128               | 0.30           | Q553*           | -4           | 0.4                     |
| MO_1051 | <i>PLXNA4</i>   | chr7:131562861 | C         | T       | 22              | 62                | 0.35           | V591I           | 3            | 0.4                     |
| MO_1051 | <i>PHOSPHO1</i> | chr17:44657062 | C         | G       | 11              | 70                | 0.16           | E117Q           | 2            | 0.4                     |
| MO_1051 | <i>MADCAM1</i>  | chr19:452701   | G         | A       | 6               | 15                | 0.40           | D234N           | 1            | 0.3                     |
| MO_1051 | <i>ABCA10</i>   | chr17:64700956 | C         | T       | 29              | 94                | 0.31           | G557E           | -2           | 0.3                     |
| MO_1051 | <i>ANKLE1</i>   | chr19:17255720 | T         | G       | 54              | 155               | 0.35           | F383V           | -1           | 0.3                     |
| MO_1051 | <i>FAT4</i>     | chr4:126459294 | C         | T       | 31              | 129               | 0.24           | Q760*           | -4           | 0.2                     |
| MO_1051 | <i>FHOD3</i>    | chr18:32552148 | G         | C       | 14              | 68                | 0.21           | K788N           | 0            | 0.2                     |
| MO_1051 | <i>KIRREL2</i>  | chr19:41049157 | C         | G       | 30              | 127               | 0.24           | L684V           | 1            | 0.2                     |
| MO_1051 | <i>FCAMR</i>    | chr1:205207606 | C         | T       | 41              | 162               | 0.25           | R18K            | 2            | 0.2                     |
| MO_1051 | <i>CDH7</i>     | chr18:61642928 | G         | A       | 15              | 61                | 0.25           | D288N           | 1            | 0.2                     |
| MO_1051 | <i>DNAH7</i>    | chr2:196560129 | C         | T       | 7               | 37                | 0.19           | E554K           | 1            | 0.2                     |
| MO_1051 | <i>ADCY10</i>   | chr1:166137634 | C         | T       | 43              | 176               | 0.24           | R109Q           | 1            | 0.2                     |
| MO_1051 | <i>CCDC36</i>   | chr3:49268748  | C         | T       | 42              | 134               | 0.31           | Q262*           | -4           | 0.1                     |
| MO_1051 | <i>FBXO15</i>   | chr18:69941604 | G         | A       | 11              | 34                | 0.32           | R297C           | -3           | 0.1                     |
| MO_1051 | <i>HOXA2</i>    | chr7:27107247  | G         | A       | 23              | 118               | 0.19           | Q252*           | -4           | 0.1                     |
| MO_1051 | <i>PAPPA2</i>   | chr1:175005504 | C         | T       | 23              | 72                | 0.32           | R1488C          | -3           | 0.1                     |
| MO_1051 | <i>PI16</i>     | chr6:37034898  | G         | A       | 19              | 58                | 0.33           | Splice acceptor |              | 0.1                     |
| MO_1051 | <i>SHANK1</i>   | chr19:55909256 | G         | A       | 15              | 54                | 0.28           | S212L           | -2           | 0.1                     |
| MO_1051 | <i>C9orf131</i> | chr9:35033137  | C         | G       | 28              | 137               | 0.20           | Q171E           | 2            | 0.1                     |
| MO_1051 | <i>ZPLD1</i>    | chr3:103678980 | C         | T       | 39              | 140               | 0.28           | S375F           | -2           | 0.1                     |
| MO_1051 | <i>CUBN</i>     | chr10:16995929 | G         | A       | 11              | 61                | 0.18           | H2474Y          | 2            | 0.1                     |
| MO_1051 | <i>C9orf153</i> | chr9:88032614  | C         | G       | 35              | 126               | 0.28           | R73T            | -1           | 0.1                     |
| MO_1051 | <i>BNC1</i>     | chr15:81723220 | C         | G       | 39              | 148               | 0.26           | G596A           | 0            | 0.1                     |
| MO_1051 | <i>ODZ1</i>     | chrX:123382210 | C         | T       | 32              | 120               | 0.27           | M1531I          | 1            | 0.0                     |
| MO_1051 | <i>CNKS2</i>    | chrX:21459906  | G         | A       | 21              | 70                | 0.30           | G368E           | -2           | 0.0                     |
| MO_1051 | <i>DNAH6</i>    | chr2:84775044  | G         | T       | 16              | 92                | 0.17           | D2485Y          | -3           | 0.0                     |
| MO_1051 | <i>FCRLA</i>    | chr1:159948581 | G         | A       | 28              | 136               | 0.21           | E262K           | 1            | 0.0                     |
| MO_1051 | <i>GCK</i>      | chr7:44153904  | C         | T       | 14              | 60                | 0.23           | E246K           | 1            | 0.0                     |

**Supplementary Table S8. Nonsynonymous somatic mutations in MO\_1051 breast cancer (Part-6).**

| SAMPLE  | GENE           | LOC (hg18)      | REFERENCE | VARIANT | VAR FRAGS TUMOR | TUMOR TOTAL FRAGS | VAR FRAC TUMOR | PROTEIN | BLOSUM SCORE | EXPRESSION LEVEL (RPKM) |
|---------|----------------|-----------------|-----------|---------|-----------------|-------------------|----------------|---------|--------------|-------------------------|
| MO_1051 | <i>TYRP1</i>   | chr9:12699141   | G         | A       | 40              | 151               | 0.26           | E525K   | 1            | 0.0                     |
| MO_1051 | <i>RHAG</i>    | chr6:49694882   | G         | T       | 8               | 28                | 0.29           | Q104K   | 1            | 0.0                     |
| MO_1051 | <i>RPH3A</i>   | chr12:111818909 | G         | C       | 16              | 60                | 0.27           | D672H   | -1           | 0.0                     |
| MO_1051 | <i>POU6F2</i>  | chr7:39213708   | G         | A       | 34              | 102               | 0.33           | G159R   | -2           | 0.0                     |
| MO_1051 | <i>MYT1L</i>   | chr2:1905497    | G         | A       | 54              | 169               | 0.32           | P351S   | -1           | 0.0                     |
| MO_1051 | <i>LRRTM4</i>  | chr2:77600343   | C         | A       | 57              | 180               | 0.32           | D54Y    | -3           | 0.0                     |
| MO_1051 | <i>ALK</i>     | chr2:29310018   | C         | T       | 32              | 109               | 0.29           | E802K   | 1            | 0.0                     |
| MO_1051 | <i>CIB4</i>    | chr2:26717641   | C         | G       | 25              | 93                | 0.27           | E16Q    | 2            | 0.0                     |
| MO_1051 | <i>A2ML1</i>   | chr12:8912114   | C         | T       | 40              | 91                | 0.44           | L1319F  | 0            | 0.0                     |
| MO_1051 | <i>GABRR1</i>  | chr6:89945354   | C         | T       | 42              | 127               | 0.33           | E426K   | 1            | 0.0                     |
| MO_1051 | <i>POU6F2</i>  | chr7:39213709   | G         | A       | 35              | 106               | 0.33           | G159E   | -2           | 0.0                     |
| MO_1051 | <i>NKX2-3</i>  | chr10:101285073 | G         | C       | 11              | 44                | 0.25           | D234H   | -1           | 0.0                     |
| MO_1051 | <i>ATP12A</i>  | chr13:24181895  | C         | G       | 15              | 83                | 0.18           | L898V   | 1            | 0.0                     |
| MO_1051 | <i>CBLN4</i>   | chr20:54009229  | G         | A       | 11              | 66                | 0.17           | H125Y   | 2            | 0.0                     |
| MO_1051 | <i>SLC1A6</i>  | chr19:14944567  | G         | C       | 28              | 101               | 0.28           | F52L    | 0            | 0.0                     |
| MO_1051 | <i>FOXI2</i>   | chr10:129425568 | C         | T       | 13              | 27                | 0.48           | P14L    | -3           | 0.0                     |
| MO_1051 | <i>OR5K3</i>   | chr3:99592974   | C         | T       | 17              | 64                | 0.27           | R259*   | -4           | 0.0                     |
| MO_1051 | <i>SPINT4</i>  | chr20:43786011  | G         | T       | 18              | 84                | 0.21           | R65I    | -3           | 0.0                     |
| MO_1051 | <i>SI</i>      | chr3:166209775  | C         | G       | 13              | 80                | 0.16           | D1389H  | -1           | 0.0                     |
| MO_1051 | <i>TMEM202</i> | chr15:70487239  | C         | G       | 6               | 37                | 0.16           | S258C   | -1           | 0.0                     |
| MO_1051 | <i>HELQ</i>    | chr4:84569908   | C         | G       | 10              | 47                | 0.21           | D771H   | -1           | NA                      |
| MO_1051 | <i>AKR1E2</i>  | chr10:4867919   | C         | A       | 20              | 62                | 0.32           | S126*   | -4           | NA                      |
| MO_1051 | <i>EPG5</i>    | chr18:41714088  | C         | T       | 12              | 33                | 0.36           | E1873K  | 1            | NA                      |
| MO_1051 | <i>BRAT1</i>   | chr7:2549466    | G         | A       | 10              | 42                | 0.24           | S274F   | -2           | NA                      |

Supplementary Table S9. Gene copy number changes in MO\_1051 breast cancer.

| Sample  | Segment (hg18)            | Genes in this region                                                                                                                                                                | Span (bp)  | Number of exons | Copy number ratio (gains)  |
|---------|---------------------------|-------------------------------------------------------------------------------------------------------------------------------------------------------------------------------------|------------|-----------------|----------------------------|
| MO_1051 | chr12:44407518-44410034   | <i>LOC400027,ARID2</i>                                                                                                                                                              | 2,516      | 2               | 3.01                       |
| MO_1051 | chr6:114285600-114288048  | <i>MARCKS</i>                                                                                                                                                                       | 2448       | 2               | 2.94                       |
| MO_1051 | chr1:150750710-151082749  | <i>KPRP,C1orf68</i> , Late envelope proteins                                                                                                                                        | 332,039    | 19              | 2.34                       |
| MO_1051 | chr11:6188000-6189418     | <i>C11orf42,FAM160A2</i>                                                                                                                                                            | 1418       | 3               | 2.07                       |
| MO_1051 | chr20:60909386-60938896   | <i>OGFR,COL9A3</i>                                                                                                                                                                  | 29,510     | 32              | 1.82                       |
| MO_1051 | chrX:34058471-34871964    | <i>TMEM47</i>                                                                                                                                                                       | 813,493    | 10              | 1.66                       |
| MO_1051 | chrX:107291498-107822692  | <i>COL4A6,COL4A5</i>                                                                                                                                                                | 531,194    | 87              | 1.61                       |
| MO_1051 | chr1:151123700-225910130  | <i>ABL2,CAMK1G,CDC42BPA,CLK2,DDR2DYRK3,ELK4,FCGR2B,IKBKE,INSRRMAPKAPK2,MARK1,MDM4,MUC1,NEK2NEK7,NPR1,NTRK1,NUAK2,PBX1PRCC,PTGS2,RNASEL,RPS6KC1,SCYL3SDHC,SLC45A3,TPM3,TPR,UHMK1</i> | 74,786,430 | 6263            | 1.59                       |
| Sample  | Segment (hg18)            | Genes in this region                                                                                                                                                                | Span (bp)  | Number of exons | Copy number ratio (losses) |
| MO_1051 | chr8:935432-947796        | <i>ERICH1-AS1</i>                                                                                                                                                                   | 12,364     | 2               | 0.13                       |
| MO_1051 | chr16:87826705-87827520   | <i>ENSG00000205014</i>                                                                                                                                                              | 815        | 2               | 0.15                       |
| MO_1051 | chr10:2787544-2920752     | --                                                                                                                                                                                  | 133,208    | 2               | 0.18                       |
| MO_1051 | chr7:157748520-157812260  | <i>PTPRN2</i>                                                                                                                                                                       | 63,740     | 5               | 0.21                       |
| MO_1051 | chr12:48557874-48559872   | <i>FAIM2</i>                                                                                                                                                                        | 1,998      | 3               | 0.22                       |
| MO_1051 | chr12:131422038-131542490 | --                                                                                                                                                                                  | 120,452    | 5               | 0.24                       |
| MO_1051 | chr4:88754446-88756667    | <i>DSPP</i>                                                                                                                                                                         | 2,221      | 3               | 0.31                       |
| MO_1051 | chr6:168856780-168857712  | --                                                                                                                                                                                  | 932        | 3               | 0.31                       |
| MO_1051 | chr9:95464514-95465753    | <i>PHF2</i>                                                                                                                                                                         | 1,239      | 3               | 0.35                       |
| MO_1051 | chr7:141566309-141567246  | --                                                                                                                                                                                  | 937        | 3               | 0.36                       |
| MO_1051 | chr9:138860132-138861212  | <i>C9orf172</i>                                                                                                                                                                     | 1,080      | 4               | 0.41                       |
| MO_1051 | chr17:11085763-11939730   | <i>SHISA6,DNAH9,ZNF18,MAP2K4</i>                                                                                                                                                    | 853,967    | 88              | 0.41                       |

**Supplementary Table S10. Gene fusions identified in MO\_1081. FGFR2 fusion is in bold.**

| Sample  | 5' Gene        | 3' Gene      | Number of Supporting Reads | Type                    |
|---------|----------------|--------------|----------------------------|-------------------------|
| MO_1081 | <b>SLC45A3</b> | <b>FGFR2</b> | <b>2020</b>                | <b>Interchromosomal</b> |
| MO_1081 | ST7            | CAV1         | 200                        | Intrachromosomal        |
| MO_1081 | MAP7           | PERP         | 161                        | Intrachromosomal        |
| MO_1081 | LAS1L          | OPHN1        | 33                         | Intrachromosomal        |
| MO_1081 | BRE            | RBKS         | 20                         | Intrachromosomal        |
| MO_1081 | BMPR1B         | SMARCD1      | 22                         | Intrachromosomal        |



**Supplementary Table S11. Summary of sequencing datasets analyzed for FGFR fusions.**

| <b>Cancer type</b>                            | <b>Data source</b> | <b>Sample number</b> | <b>FGFR Fusion</b> |
|-----------------------------------------------|--------------------|----------------------|--------------------|
| BRCA (Breast cancer)                          | TCGA               | 746                  | 3                  |
| LUSC (Lung squamous carcinoma)                | TCGA               | 222                  | 6                  |
| BLCA (Bladder Urothelial Carcinoma)           | TCGA               | 85                   | 3                  |
| GBM (Glioblastoma multiforme)                 | TCGA               | 163                  | 2                  |
| HNSC (Head and neck squamous cell carcinoma ) | TCGA               | 284                  | 2                  |
| THCA (Papillary thyroid cancer)               | TCGA               | 237                  | 1                  |
| LUAD (Lung adenocarcinoma)                    | TCGA               | 299                  | 0                  |
| LIHC (Liver Hepatocellular Carcinoma)         | TCGA               | 17                   | 0                  |
| MI-ONCOSEQ patients                           | U Michigan         | 90                   | 4                  |
| Research cohorts                              | U Michigan         | 232                  | 3                  |

Total: 2375 24

**Research Cohorts from the University of Michigan**

| <b>Cancer type</b> | <b>Sample number</b> | <b>Cell line</b> | <b>Tissue</b> |
|--------------------|----------------------|------------------|---------------|
| Bladder            | 2                    | 2                | 0             |
| Breast             | 93                   | 53               | 40            |
| Cervical           | 9                    | 9                | 0             |
| Colon              | 9                    | 9                | 0             |
| Leukemia           | 4                    | 0                | 4             |
| Lymphoma           | 5                    | 5                | 0             |
| Melanoma           | 7                    | 7                | 0             |
| Oral               | 6                    | 6                | 0             |
| Pancreas           | 25                   | 25               | 0             |
| Prostate           | 31                   | 0                | 31            |
| Rare cancer        | 41                   | 41               | 0             |

Total: 232 157 75

**Supplementary Table S12. FGFR fusions in human cancers identified by transcriptome sequencing.** LUSC, Lung squamous cell carcinoma; THCA, Thyroid carcinoma; GBM, Glioblastoma multiforme; HNSC, Head and Neck squamous cell carcinoma. Inter, interchromosomal; Intra, intrachromosomal.

**FGFR2 fusions**

| 5' Gene        | 3' Gene         | Sample ID                    | Cancer type        | Fusion | Predominant isoform | Isoform ratio (major/minor) |
|----------------|-----------------|------------------------------|--------------------|--------|---------------------|-----------------------------|
| <i>FGFR2</i>   | <i>AFF3</i>     | MO_1051 (MI-ONCOSEQ case)    | Breast             | Inter  | IIIc                | 6.7                         |
| <i>FGFR2</i>   | <i>CCDC6</i>    | TCGA-D8-A13Z-01A-11R-A115-07 | Breast             | Intra  | IIIc                | 72.9                        |
| <i>FGFR2</i>   | <i>CASP7</i>    | TCGA-AN-A0AL-01A-11R-A00Z-07 | Breast             | Intra  | IIIc                | 14.8                        |
| <i>FGFR2</i>   | <i>BICC1</i>    | MO_1036 (MI-ONCOSEQ case)    | Cholangiocarcinoma | Intra  | IIIb                | 13.5                        |
| <i>FGFR2</i>   | <i>BICC1</i>    | MO_1039 (MI-ONCOSEQ case)    | Cholangiocarcinoma | Intra  | IIIb                | 5.9                         |
| <i>FGFR2</i>   | <i>KIAA1967</i> | TCGA-66-2765-01A-01R-0851-07 | LUSC               | Inter  | IIIc                | 24.3                        |
| <i>FGFR2</i>   | <i>OFD1</i>     | TCGA-BJ-A0Z0-01A-11R-A10U-07 | THCA               | Inter  | IIIc                | 67.2                        |
| <i>SLC45A3</i> | <i>FGFR2</i>    | MO_1081 (MI-ONCOSEQ case)    | Prostate           | Inter  | IIIb                | 1.8                         |

**FGFR3 fusions**

| 5' Gene      | 3' Gene         | Sample ID                              | Cancer type | Fusion | Predominant isoform | Isoform ratio (major/minor) |
|--------------|-----------------|----------------------------------------|-------------|--------|---------------------|-----------------------------|
| <i>FGFR3</i> | <i>BAIAP2L1</i> | SW780 (Internal collection; cell line) | Bladder     | Inter  | IIIb                | 10.2                        |
| <i>FGFR3</i> | <i>TACC3</i>    | RT4 (Internal collection; cell line)   | Bladder     | Intra  | IIIb                | 7.9                         |
| <i>FGFR3</i> | <i>TACC3</i>    | C9 (Internal collection; cell line)    | Oral cancer | Intra  | IIIb                | 12.7                        |
| <i>FGFR3</i> | <i>TACC3</i>    | TCGA-CF-A3MF-01A-12R-A21D-07           | Bladder     | Intra  | IIIc                | 1.9                         |
| <i>FGFR3</i> | <i>TACC3</i>    | TCGA-CF-A3MG-01A-11R-A20F-07           | Bladder     | Intra  | IIIb                | 40.6                        |
| <i>FGFR3</i> | <i>TACC3</i>    | TCGA-CF-A3MH-01A-11R-A20F-07           | Bladder     | Intra  | IIIb                | 12.3                        |
| <i>FGFR3</i> | <i>TACC3</i>    | TCGA-27-1835-01A-01R-1850-01           | GBM         | Intra  | IIIc                | 8.4                         |
| <i>FGFR3</i> | <i>TACC3</i>    | TCGA-76-4925-01A-01R-1850-01           | GBM         | Intra  | IIIc                | 28.9                        |
| <i>FGFR3</i> | <i>TACC3</i>    | TCGA-CR-6473-01A-11R-1873-07           | HNSC        | Intra  | IIIb                | 11.1                        |
| <i>FGFR3</i> | <i>TACC3</i>    | TCGA-CV-7100-01A-11R-2016-07           | HNSC        | Intra  | IIIb                | 14.5                        |
| <i>FGFR3</i> | <i>TACC3</i>    | TCGA-66-2786-01A-01R-0851-07           | LUSC        | Intra  | IIIb                | 34.4                        |
| <i>FGFR3</i> | <i>TACC3</i>    | TCGA-39-5024-01A-21R-1820-07           | LUSC        | Intra  | IIIb                | 10.1                        |
| <i>FGFR3</i> | <i>TACC3</i>    | TCGA-22-4607-01A-01R-1201-07           | LUSC        | Intra  | IIIb                | 9.5                         |
| <i>FGFR3</i> | <i>TACC3</i>    | TCGA-34-2608-01A-02R-0851-07           | LUSC        | Intra  | IIIb                | 20.8                        |

**FGFR1 fusions**

| 5' Gene       | 3' Gene      | Sample ID                    | Cancer type | Fusion | Predominant isoform | Isoform ratio (major/minor) |
|---------------|--------------|------------------------------|-------------|--------|---------------------|-----------------------------|
| <i>ERLIN2</i> | <i>FGFR1</i> | TCGA-D8-A1JC-01A-11R-A13Q-07 | Breast      | Intra  | IIIc                | 14.5                        |
| <i>BAG4</i>   | <i>FGFR1</i> | TCGA-22-5480-01A-01R-1635-07 | LUSC        | Intra  | IIIc                | 20.9                        |

**Supplementary Table S13. Accession numbers of reference genes.**

| <b>GENE / ISOFORM</b> | <b>TRANSCRIPT</b> | <b>PROTEIN</b> |
|-----------------------|-------------------|----------------|
| FGFR1 IIIc            | NM_023110         | NP_075598      |
| FGFR2 IIIb            | NM_022970         | NP_075259      |
| FGFR2 IIIc            | NM_000141         | NP_000132      |
| FGFR3 IIIb            | NM_001163213      | NP_001156685   |
| FGFR3 IIIc            | NM_000142         | NP_000133      |
| AFF3                  | NM_002285         | NP_002276      |
| BAG4                  | NM_004874         | NP_004865      |
| BAIAP2L1              | NM_018842         | NP_061330      |
| BICC1                 | NM_001080512      | NP_001073981   |
| CASP7                 | NM_001227         | NP_001218      |
| CCDC6                 | NM_005436         | NP_005427      |
| ERLIN2                | NM_007175         | NP_009106      |
| KIAA1967              | NM_021174         | NP_066997      |
| OFD1                  | NM_003611         | NP_003602      |
| SLC45A3               | NM_033102         | NP_149093      |
| TACC3                 | NM_006342         | NP_006333      |

**Supplementary Table S14. Junction sequences of FGFR fusion transcripts.**

| <b>5' Gene</b>         | <b>Junction Sequence</b>                      | <b>3' Gene</b>         |
|------------------------|-----------------------------------------------|------------------------|
| <i>BAG4</i> exon 2     | AGACCAGAATTGCAAGGCCAG   GTCCGTTATGCCACCTGGAGC | <i>FGFR1</i> exon 9    |
| <i>ERLIN2</i> exon 10  | CCGCAGAAACTACGAGTTGAT   GGTCAGTTTGAAAAGGAGGAT | <i>FGFR1</i> exon 4    |
| <i>FGFR2</i> exon 19   | CTCACTCTCACAACCAATGAG   GAGAGTAGATCTGGAGAAACC | <i>AFF3</i> exon 8     |
| <i>FGFR2</i> exon 19   | CTCACTCTCACAACCAATGAG   ATCATGGAGGAAACAAATACG | <i>BICC1</i> exon 3    |
| <i>FGFR2</i> exon 19   | CTCACTCTCACAACCAATGAG   ATGGCAGATGATCAGGGCTGT | <i>CASP7</i> exon 4    |
| <i>FGFR2</i> exon 19   | CTCACTCTCACAACCAATGAG   CAAGCCAGGGCTGAGCAGGAA | <i>CCDC6</i> exon 2    |
| <i>FGFR2</i> exon 19   | CTCACTCTCACAACCAATGAG   GGTGGGGAGAAACAGCGGGTC | <i>KIAA1967</i> exon 5 |
| <i>FGFR2</i> exon 19   | CTCACTCTCACAACCAATGAG   ACACAACCTCGAAACCAGCTA | <i>OFD1</i> exon 3     |
| <i>SLC45A3</i> exon 1  | ACAGCCGCGCGCCTCGGCCAG   TGACTGCAGCAGCAGCGGCAG | <i>FGFR2</i> exon 3b   |
| <i>FGFR3</i> exon 18   | CTTACCGTGACGTCCACCGAC   AATGTTATGGAACAGTTCAAT | <i>BAIAP2L1</i> exon 2 |
| <i>FGFR3</i> exon 18   | CTTACCGTGACGTCCACCGAC   GTGCCAGGCCACCCCCAGGT  | <i>TACC3</i> exon 10   |
| <i>FGFR3</i> exon 18   | CTTACCGTGACGTCCACCGAC   GTAAAGGCGACACAGGAGGAG | <i>TACC3</i> exon 11   |
| <i>FGFR3</i> intron 18 | GCTGAGGTGTGGGGCGGGCCT   TCTGGCCCAGGTGCCCTGGCT | <i>TACC3</i> exon 4    |

**Supplementary Table S15. Primer sequences.**

**Cloning of FGFR fusion alleles**

|                 |                                       |
|-----------------|---------------------------------------|
| FGFR2 FL-S      | CAACGGTCCGACCATGGTCAGCTGGGGTCGTTTCATC |
| CCDC6 TAG-AS    | GAACGGACCGAAAGGCTGGGAGGAGGGGTG        |
| BICC1 TAG-AS    | GAACGGACCGCGGCCACTGACACTAGCAATGT      |
| FGFR3 FL-S      | CAACGGTCCGACCATGGGCGCCCCTGCCT         |
| TACC3 TAG-AS    | CAACGGACCGATCTTCTCCATCTTGGAGATGAG     |
| BAIAP2L1 TAG-AS | GAACGGACCGCGAATGATGGGTGCCGAGCGAT      |

**Cloning of FGFR fusion partners**

|                 |                                            |
|-----------------|--------------------------------------------|
| BAIAP2L1 DIM-S  | CAACGGTCCGACCATGAATGTTATGGAACAGTTCAATCC    |
| BAIAP2L1 TAG-AS | GAACGGACCGCGAATGATGGGTGCCGAGCGAT           |
| BICC1 DIM-S     | GAACGGTCCGACCATGATCATGGAGGAAACAAATACGCAGA  |
| BICC1 TAG-AS    | CAACGGACCGCCACTGACACTAGCAATGTCTGA          |
| TACC3 DIM-S     | CAACGGTCCGACCATGGTGCCAGGCCACCCCCAGGTGTT    |
| TACC3 TAG-AS    | CAACGGACCGATCTTCTCCATCTTGGAGATGAG          |
| KIAA1967CPO-S   | GAACGGTCCGACCATGGGTGGGGAGAAACAGCGGGTCTTCA  |
| KIAA1967 TAG-AS | CTTCGGACCGTTGCTAGGTGCCGGCTCCTCCTT          |
| CCDC6 DIM-S     | GAACGGTCCGACCATGCAAGCCAGGGCTGAGCAGGAAGAA   |
| CCDC6 TAG-AS    | GAACGGACCGAAAGGCTGGGAGGAGGGGTG             |
| CIT DIM-S       | CAACGGTCCGACCATGGCACATAGAGATGAAATCCAGCGCAA |
| CIT TAG-AS      | CAACGGACCGACTGAAGACTGGTCCCAGACCTT          |

**Quantitative RT-PCR primers**

|                       |                       |
|-----------------------|-----------------------|
| FGFR2-AFF3 QPCR-F     | CCAACCTGCACCAACGAACTG |
| FGFR2-AFF3 QPCR-R     | GTGGAAGCCAGGTCATCTCC  |
| FGFR2-BICC QPCR-F     | GCTGCTGAAGGAAGGACACA  |
| FGFR2-BICC QPCR-R     | ATGGCCAAGCAATCTGCGTA  |
| FGFR3-BAIAP2L1 QPCR-F | GACCTGGACCGTGTCTTAC   |
| FGFR3-BAIAP2L1 QPCR-R | GATCTTGGCCACTCCATCGT  |
